# Supplementary material
Source: ML conference proceedings conference paper supplement (https://openaccess.thecvf.com/content/CVPR2023/html/Yu_How_To_Prevent_CVPR_2023_paper.html)
Supplement: Supplementary file 1 [file Yu_How_To_Prevent_CVPR_2023_supplemental.zip]

Archive with 2 entries (2 files):
- code.zip
- CVPR_2023_Paper8456_Supplements.pdf
